# Supplementary material for: The Spalt family transcription factor Sall3 regulates the development of cone photoreceptors and retinal horizontal interneurons
Source: PubMed Central journal article supplement — Development. 2011 Jun 1;138(11):2325–36. doi: 10.1242/dev.061846 (PMC3091496; doi:10.1242/dev.061846), 2011-06-01
Supplement: supp_138.11.2325_DEV061846TableS1.pdf [file supp_138.11.2325_DEV061846TableS1.pdf]

**Table S1. RNA expression levels in P0-7DIV explants of wild-type and *Sall3*<sup>-/-</sup> retina**

| Probe ID | Mean (KO) | Mean (WT) | KO vs. WT (ratio) | KO vs. WT (P-value) | Gene symbol          | Gene Entrez ID | Cellular expression pattern | Reference                |
|----------|-----------|-----------|-------------------|---------------------|----------------------|----------------|-----------------------------|--------------------------|
| 6952362  | 5.7       | 8.39      | 0.15              | 0.002989            | <i>Opn1sw</i>        | 12057          | Cones                       | (Akimoto et al., 2006)   |
| 6765271  | 5.17      | 6.65      | 0.36              | 0.015621            | <i>Rd3</i>           | 74023          | Rods+cones                  | (Corbo et al., 2007)     |
| 6869545  | 6.67      | 8         | 0.4               | 0.000397            | <i>Pde6c</i>         | 110855         | Cones                       | (Akimoto et al., 2006)   |
| 6790340  | 4.43      | 5.5       | 0.48              | 0.000182            | <i>Lhx1</i>          | 16869          | HC                          | (Liu et al., 2000)       |
| 7012840  | 4.54      | 5.33      | 0.58              | 0.000794            | <i>Arr3</i>          | 170735         | Cones                       | (Corbo et al., 2007)     |
| 6855754  | 3.85      | 4.6       | 0.59              | 0.000719            | <i>Guca1a</i>        | 14913          | Rods+cones                  | (Corbo et al., 2007)     |
| 6765270  | 7.68      | 8.41      | 0.6               | 0.468527            | <i>Rd3</i>           | 74023          | Rods+cones                  | (Corbo et al., 2007)     |
| 6913195  | 4.53      | 5.18      | 0.64              | 0.000015            | <i>Tmod1</i>         | 21916          | HC                          | (Yao and Sung, 2009)     |
| 6762660  | 7.72      | 8.31      | 0.66              | 0.152166            | <i>Crb1</i>          | 170788         | Rods+cones                  | (Corbo et al., 2007)     |
| 6900191  | 3.96      | 4.55      | 0.66              | 0.000259            | <i>Ppm1j</i>         | 71887          | Cones                       | (Corbo et al., 2007)     |
| 6907864  | 4.45      | 5.05      | 0.66              | 0.005208            | <i>Fam19a3</i>       | 329731         | Cones                       | (Corbo et al., 2007)     |
| 6796728  | 4.26      | 4.84      | 0.67              | 0.000685            | <i>Esrrb</i>         | 26380          | HC                          | (Blackshaw et al., 2004) |
| 6825573  | 8.28      | 8.86      | 0.67              | 0.007058            | <i>Nefm</i>          | 18040          | HC                          | (Chien and Liem, 1995)   |
| 6946119  | 8.19      | 8.76      | 0.67              | 0.05002             | <i>Npy</i>           | 109648         | HC                          | (Blackshaw et al., 2004) |
| 6819974  | 7.58      | 8.16      | 0.67              | 0.077627            | <i>Nefl</i>          | 18039          | HC                          | (Chien and Liem, 1995)   |
| 6843216  | 4.98      | 5.54      | 0.68              | 0.04755             | <i>Kcne2</i>         | 246133         | Cones                       | (Corbo et al., 2007)     |
| 6929517  | 4.64      | 5.14      | 0.7               | 0.004863            | <i>En2</i>           | 13799          | Cones                       | (Akimoto et al., 2006)   |
| 6771063  | 5.19      | 5.65      | 0.73              | 0.394033            | <i>Dyrk2</i>         | 69181          | Rods+cones                  | (Blackshaw et al., 2004) |
| 6870622  | 5.09      | 5.54      | 0.73              | 0.072529            | <i>Adrb1</i>         | 11554          | Cones                       | (Akimoto et al., 2006)   |
| 6777421  | 7.05      | 7.46      | 0.75              | 0.072522            | <i>Dyrk2</i>         | 69181          | Rods+cones                  | (Blackshaw et al., 2004) |
| 6832300  | 3.83      | 4.23      | 0.76              | 0.025045            | <i>Parvb</i>         | 170736         | Cones                       | (Corbo et al., 2007)     |
| 7011987  | 4.53      | 4.91      | 0.77              | 0.111638            | <i>Opn1mw</i>        | 14539          | Cones                       | (Akimoto et al., 2006)   |
| 6929702  | 4.1       | 4.45      | 0.79              | 0.029664            | <i>Gckr</i>          | 231103         | Rods+cones                  | (Corbo et al., 2007)     |
| 6748695  | 3.8       | 4.13      | 0.8               | 0.008674            | <i>Cnga3</i>         | 12790          | Cones                       | (Corbo et al., 2007)     |
| 6783785  | 5.66      | 5.96      | 0.81              | 0.018159            | <i>Gngt2</i>         | 14710          | Cones                       | (Corbo et al., 2007)     |
| 6866962  | 3.91      | 4.19      | 0.82              | 0.003443            | <i>Sall3</i>         | 20689          | HC+cones                    | This study               |
| 6945004  | 5.83      | 6.11      | 0.82              | 0.073907            | <i>Ccdc136</i>       | 232664         | Cones                       | (Corbo et al., 2007)     |
| 6867859  | 6.62      | 6.9       | 0.82              | 0.312532            | <i>Pygm</i>          | 19309          | Cones                       | (Akimoto et al., 2006)   |
| 6950515  | 4.03      | 4.28      | 0.84              | 0.001836            | <i>Pde6h</i>         | 78600          | Cones                       | (Akimoto et al., 2006)   |
| 6790852  | 3.61      | 3.85      | 0.84              | 0.365461            | <i>Car10</i>         | 72605          | BC                          | (Kim et al., 2008)       |
| 6792614  | 3.78      | 4.01      | 0.85              | 0.106863            | <i>Socs3</i>         | 12702          | Cones                       | (Akimoto et al., 2006)   |
| 6907089  | 4.38      | 4.62      | 0.85              | 0.414147            | <i>2310007A19Rik</i> | 66353          | Cones                       | (Corbo et al., 2007)     |
| 6873149  | 6.21      | 6.43      | 0.86              | 0.012953            | <i>Slit1</i>         | 20562          | HC                          | (Blackshaw et al., 2004) |
| 6910137  | 4.29      | 4.5       | 0.87              | 0.038774            | <i>Ctca3</i>         | 23844          | Cones                       | (Corbo et al., 2007)     |
| 6757035  | 4.44      | 4.65      | 0.87              | 0.215846            | <i>Eya1</i>          | 14048          | Cones                       | (Corbo et al., 2007)     |
| 7013389  | 5.77      | 5.98      | 0.87              | 0.400305            | <i>Klhl4</i>         | 237010         | Cones                       | (Corbo et al., 2007)     |
| 6783321  | 7.17      | 7.35      | 0.88              | 0.107106            | <i>Sep4</i>          | 18952          | HC                          | (Blackshaw et al., 2004) |
| 6911914  | 7.4       | 7.58      | 0.88              | 0.164081            | <i>Calb1</i>         | 12307          | HC                          | (Pochet et al., 1991)    |
| 6946138  | 5.83      | 6         | 0.88              | 0.00188             | <i>Mpp6</i>          | 56524          | Cones                       | (Corbo et al., 2007)     |
| 6993849  | 2.93      | 3.11      | 0.88              | 0.041465            | <i>Rgl3</i>          | 71746          | Cones                       | (Corbo et al., 2007)     |
| 6900360  | 5.39      | 5.58      | 0.88              | 0.232979            | <i>Gnat2</i>         | 14686          | Cones                       | (Akimoto et al., 2006)   |
| 6818944  | 5.62      | 5.8       | 0.88              | 0.245375            | <i>Pnp1</i>          | 18950          | Cones                       | (Corbo et al., 2007)     |
| 6836805  | 4.42      | 4.59      | 0.89              | 0.091229            | <i>Plec1</i>         | 18810          | Cones                       | (Corbo et al., 2007)     |
| 6769137  | 5.63      | 5.79      | 0.89              | 0.214264            | <i>Gzmm</i>          | 16904          | Cones                       | (Corbo et al., 2007)     |
| 6765166  | 6.9       | 7.04      | 0.91              | 0.183673            | <i>Prox1</i>         | 19130          | HC                          | (Dyer et al., 2003)      |
| 6770888  | 4.04      | 4.17      | 0.92              | 0.179258            | <i>A930009A15Rik</i> | 77798          | Cones                       | (Corbo et al., 2007)     |
| 6900014  | 4.63      | 4.74      | 0.92              | 0.215805            | <i>Igfb3</i>         | 78908          | Cones                       | (Corbo et al., 2007)     |
| 6911727  | 4.61      | 4.73      | 0.92              | 0.289074            | <i>Gem</i>           | 14579          | Cones                       | (Corbo et al., 2007)     |
| 6972292  | 4.03      | 4.14      | 0.93              | 0.052191            | <i>6330512M04Rik</i> | 320802         | Cones                       | (Corbo et al., 2007)     |
| 6945308  | 3.61      | 3.72      | 0.93              | 0.055025            | <i>Akr1b8</i>        | 14187          | Cones                       | (Corbo et al., 2007)     |
| 6785684  | 6.16      | 6.24      | 0.94              | 0.824328            | <i>Nefh</i>          | 380684         | HC                          | (Chien and Liem, 1995)   |
| 6866653  | 4.06      | 4.15      | 0.94              | 0.120924            | <i>Mapk4</i>         | 225724         | Cones                       | (Corbo et al., 2007)     |
| 6875933  | 7.93      | 8.02      | 0.94              | 0.153998            | <i>Olfm1</i>         | 56177          | Cones                       | (Akimoto et al., 2006)   |
| 6908092  | 6.73      | 6.83      | 0.94              | 0.2243              | <i>Ampd2</i>         | 109674         | Cones                       | (Corbo et al., 2007)     |
| 6872980  | 4.09      | 4.18      | 0.94              | 0.364374            | <i>Rbp4</i>          | 19662          | Cones                       | (Corbo et al., 2007)     |
| 6957137  | 9.95      | 10.04     | 0.94              | 0.478346            | <i>Gnb3</i>          | 14695          | Cones                       | (Akimoto et al., 2006)   |
| 6963197  | 5.3       | 5.39      | 0.94              | 0.817855            | <i>Cckbr</i>         | 12426          | Cones                       | (Corbo et al., 2007)     |
| 6762236  | 7.11      | 7.2       | 0.94              | 0.579985            | <i>Nfasc</i>         | 269116         | BC                          | (Kim et al., 2008)       |
| 6787285  | 4.02      | 4.09      | 0.95              | 0.053874            | <i>Wwc1</i>          | 211652         | Cones                       | (Corbo et al., 2007)     |
| 6824556  | 3.47      | 3.54      | 0.95              | 0.31346             | <i>A930018M24Rik</i> | 328399         | Cones                       | (Corbo et al., 2007)     |
| 6884101  | 5.69      | 5.74      | 0.96              | 0.447526            | <i>Cdh4</i>          | 12561          | HC                          | (Blackshaw et al., 2004) |
| 6994157  | 5.5       | 5.56      | 0.96              | 0.331283            | <i>Jam3</i>          | 83964          | Cones                       | (Corbo et al., 2007)     |
| 6917970  | 7.04      | 7.09      | 0.96              | 0.365639            | <i>Ece1</i>          | 230857         | Cones                       | (Akimoto et al., 2006)   |
| 6771587  | 3.71      | 3.78      | 0.96              | 0.486735            | <i>Rdh9</i>          | 103142         | Cones                       | (Corbo et al., 2007)     |
| 6869543  | 3.64      | 3.69      | 0.96              | 0.509155            | <i>Gpr120</i>        | 107221         | Cones                       | (Corbo et al., 2007)     |
| 6776049  | 4.39      | 4.44      | 0.96              | 0.553455            | <i>Elk3</i>          | 13713          | Cones                       | (Corbo et al., 2007)     |
| 6764182  | 4.14      | 4.2       | 0.96              | 0.764277            | <i>Dusp23</i>        | 68440          | Cones                       | (Corbo et al., 2007)     |

|         |       |       |      |          |                      |        |               |                          |
|---------|-------|-------|------|----------|----------------------|--------|---------------|--------------------------|
| 6755253 | 3.92  | 3.97  | 0.97 | 0.037297 | <i>Crp</i>           | 12944  | Cones         | (Corbo et al., 2007)     |
| 6932883 | 3.68  | 3.72  | 0.97 | 0.482066 | <i>Agpat9</i>        | 231510 | Cones         | (Corbo et al., 2007)     |
| 6873133 | 4.28  | 4.33  | 0.97 | 0.563301 | <i>Pik3ap1</i>       | 83490  | Cones         | (Corbo et al., 2007)     |
| 6751349 | 7.67  | 7.72  | 0.97 | 0.669914 | <i>Dgkd</i>          | 227333 | Cones         | (Corbo et al., 2007)     |
| 6801677 | 5.24  | 5.28  | 0.97 | 0.718686 | <i>Six6os1</i>       | 75801  | Cones         | (Akimoto et al., 2006)   |
| 6990418 | 6.79  | 6.83  | 0.97 | 0.730128 | <i>Prtg</i>          | 235472 | Cones         | (Corbo et al., 2007)     |
| 6776128 | 4.58  | 4.62  | 0.97 | 0.81374  | <i>Gm4792</i>        | 215472 | Cones         | (Corbo et al., 2007)     |
| 6763231 | 6.56  | 6.61  | 0.97 | 0.812168 | <i>Lhx4</i>          | 16872  | BC            | (Blackshaw et al., 2004) |
| 6792310 | 6.22  | 6.24  | 0.98 | 0.881445 | <i>Cdc42ep4</i>      | 56699  | HC            | (Blackshaw et al., 2004) |
| 6792031 | 5.63  | 5.66  | 0.98 | 0.710605 | <i>Prkca</i>         | 18750  | BC            | (Kim et al., 2008)       |
| 6794766 | 7.01  | 7.02  | 0.99 | 0.81357  | <i>Nrcam</i>         | 319504 | Cones         | (Akimoto et al., 2006)   |
| 6874212 | 7.26  | 7.27  | 0.99 | 0.859014 | <i>Eif3a</i>         | 13669  | Cones         | (Corbo et al., 2007)     |
| 7011286 | 9.51  | 9.52  | 0.99 | 0.947053 | <i>Cx1c</i>          | 72865  | Cones         | (Corbo et al., 2007)     |
| 6885462 | 3.92  | 3.94  | 0.99 | 0.720566 | <i>Lhx3</i>          | 16871  | BC            | (Blackshaw et al., 2004) |
| 6796612 | 11.12 | 11.13 | 0.99 | 0.92661  | <i>Vsx2</i>          | 12677  | BC            | (Kim et al., 2008)       |
| 6928742 | 4.56  | 4.57  | 1    | 0.911093 | <i>Abcb4</i>         | 18670  | Cones         | (Akimoto et al., 2006)   |
| 6754227 | 5.7   | 5.69  | 1    | 0.947651 | <i>Acbd6</i>         | 72482  | Cones         | (Corbo et al., 2007)     |
| 6967844 | 3.51  | 3.51  | 1    | 0.96856  | <i>4930554H23Rik</i> | 77631  | Cones         | (Corbo et al., 2007)     |
| 6967054 | 3.53  | 3.54  | 1    | 0.969283 | <i>Tph1</i>          | 21990  | Cones         | (Akimoto et al., 2006)   |
| 6825441 | 6.12  | 6.12  | 1    | 0.979772 | <i>Gulo</i>          | 268756 | Cones         | (Akimoto et al., 2006)   |
| 6775160 | 4.46  | 4.45  | 1    | 0.980542 | <i>Mmp11</i>         | 17385  | Cones         | (Corbo et al., 2007)     |
| 6870614 | 4.33  | 4.33  | 1    | 0.982495 | <i>Casp7</i>         | 12369  | Cones         | (Akimoto et al., 2006)   |
| 6962873 | 5.63  | 5.63  | 1    | 0.987747 | <i>Mtap6</i>         | 17760  | Cones         | (Corbo et al., 2007)     |
| 6769213 | 8.97  | 8.96  | 1    | 0.970371 | <i>Plk5</i>          | 216166 | BC            | (Kim et al., 2008)       |
| 6849386 | 5.33  | 5.32  | 1.01 | 0.953737 | <i>Gng13</i>         | 64337  | BC            | (Kim et al., 2008)       |
| 6909648 | 4.98  | 4.96  | 1.01 | 0.744142 | <i>Nfkb1</i>         | 18033  | Cones         | (Akimoto et al., 2006)   |
| 6912931 | 3.88  | 3.86  | 1.01 | 0.776764 | <i>Dnaic1</i>        | 68922  | Cones         | (Corbo et al., 2007)     |
| 6760251 | 7.95  | 7.94  | 1.01 | 0.866505 | <i>Sphkap</i>        | 77629  | Cones         | (Corbo et al., 2007)     |
| 6916322 | 5.19  | 5.17  | 1.01 | 0.902808 | <i>Bend5</i>         | 67621  | Cones         | (Corbo et al., 2007)     |
| 6850863 | 5.74  | 5.73  | 1.01 | 0.924323 | <i>Lfn2</i>          | 70530  | Cones         | (Corbo et al., 2007)     |
| 6963011 | 5.58  | 5.55  | 1.02 | 0.180998 | <i>Clpb</i>          | 20480  | Cones         | (Corbo et al., 2007)     |
| 6957304 | 5.86  | 5.83  | 1.02 | 0.636381 | <i>Prmt8</i>         | 381813 | Cones         | (Corbo et al., 2007)     |
| 6769845 | 5.68  | 5.66  | 1.02 | 0.730027 | <i>Pctk2</i>         | 237459 | Cones         | (Corbo et al., 2007)     |
| 6961099 | 6.02  | 6     | 1.02 | 0.878354 | <i>Trpm1</i>         | 17364  | BC            | (Kim et al., 2008)       |
| 6813327 | 6.67  | 6.62  | 1.03 | 0.799976 | <i>Cltb</i>          | 74325  | Cones         | (Corbo et al., 2007)     |
| 6925904 | 7.38  | 7.34  | 1.03 | 0.823418 | <i>Trnp1</i>         | 69539  | BC            | (Kim et al., 2008)       |
| 6996956 | 7.99  | 7.93  | 1.04 | 0.242948 | <i>Scg3</i>          | 20255  | Cones         | (Akimoto et al., 2006)   |
| 6917057 | 5.27  | 5.21  | 1.04 | 0.285949 | <i>Epha10</i>        | 230735 | Cones         | (Corbo et al., 2007)     |
| 6928457 | 5.3   | 5.24  | 1.04 | 0.322135 | <i>Cdk6</i>          | 12571  | Cones         | (Corbo et al., 2007)     |
| 6812642 | 7.96  | 7.91  | 1.04 | 0.555195 | <i>Elovl2</i>        | 54326  | Cones         | (Akimoto et al., 2006)   |
| 6948797 | 5.13  | 5.08  | 1.04 | 0.375687 | <i>Cntn4</i>         | 269784 | BC            | (Kim et al., 2008)       |
| 6919497 | 6.22  | 6.16  | 1.04 | 0.778623 | <i>Car8</i>          | 12319  | BC            | (Kim et al., 2008)       |
| 6789051 | 5.32  | 5.25  | 1.05 | 0.281977 | <i>Myocd</i>         | 214384 | Cones         | (Corbo et al., 2007)     |
| 6953505 | 5.3   | 5.22  | 1.05 | 0.563917 | <i>Dfna5</i>         | 54722  | Cones         | (Corbo et al., 2007)     |
| 6864454 | 6.58  | 6.51  | 1.05 | 0.683321 | <i>Osgep</i>         | 66246  | Cones         | (Akimoto et al., 2006)   |
| 6999646 | 4.42  | 4.34  | 1.06 | 0.599236 | <i>Tmem158</i>       | 72309  | Cones         | (Corbo et al., 2007)     |
| 6780816 | 7.75  | 7.67  | 1.06 | 0.68769  | <i>Grm6</i>          | 108072 | BC            | (Kim et al., 2008)       |
| 6973546 | 9.13  | 9.02  | 1.07 | 0.683414 | <i>Cabp5</i>         | 29865  | Cones+BC      | (Kim et al., 2008)       |
| 6926696 | 3.27  | 3.17  | 1.07 | 0.06724  | <i>Tmem206</i>       | 66950  | Cones         | (Corbo et al., 2007)     |
| 6782703 | 5.05  | 4.93  | 1.08 | 0.657054 | <i>Sebox</i>         | 18292  | BC            | (Kim et al., 2008)       |
| 6791064 | 2.96  | 2.83  | 1.09 | 0.059894 | <i>Abi3</i>          | 66610  | Cones         | (Corbo et al., 2007)     |
| 6980075 | 6.72  | 6.59  | 1.09 | 0.226969 | <i>Pcp2</i>          | 18545  | BC            | (Kim et al., 2008)       |
| 6894218 | 5.13  | 5     | 1.09 | 0.577314 | <i>Bhlhe23</i>       | 140489 | BC            | (Kim et al., 2008)       |
| 6785123 | 5.42  | 5.28  | 1.1  | 0.296297 | <i>Otop3</i>         | 69602  | Cones         | (Corbo et al., 2007)     |
| 6878954 | 6.18  | 6.05  | 1.1  | 0.496871 | <i>Crxos1</i>        | 546024 | Cones         | (Corbo et al., 2007)     |
| 6754900 | 6.21  | 6.07  | 1.1  | 0.520298 | <i>Rxrg</i>          | 20183  | Cones         | (Akimoto et al., 2006)   |
| 6781889 | 10.41 | 10.26 | 1.11 | 0.065391 | <i>Rcvrn</i>         | 19674  | Rods+cones+BC | (Kim et al., 2008)       |
| 6912018 | 6.24  | 6.09  | 1.11 | 0.256294 | <i>Cngb3</i>         | 30952  | Cones         | (Akimoto et al., 2006)   |
| 6936104 | 7.44  | 7.23  | 1.16 | 0.192117 | <i>Crot</i>          | 74114  | Cones         | (Corbo et al., 2007)     |
| 6768075 | 8.26  | 8.03  | 1.17 | 0.490327 | <i>Fabp7</i>         | 12140  | Cones         | (Corbo et al., 2007)     |
| 6811716 | 8.01  | 7.75  | 1.2  | 0.132629 | <i>Scgn</i>          | 214189 | BC            | (Kim et al., 2008)       |
| 6958812 | 5.71  | 5.37  | 1.26 | 0.002912 | <i>Crxos1</i>        | 546024 | Cones         | (Corbo et al., 2007)     |
| 6768076 | 6.1   | 5.77  | 1.26 | 0.39894  | <i>Smpd13a</i>       | 57319  | Cones         | (Corbo et al., 2007)     |
| 7006379 | 4.72  | 4.33  | 1.31 | 0.234274 | <i>9330159M07Rik</i> | 319673 | Cones         | (Corbo et al., 2007)     |
| 6901573 | 6.85  | 6.24  | 1.53 | 0.092015 | <i>Tacr3</i>         | 21338  | BC            | (Kim et al., 2008)       |

Probe identities for the Affymetrix Mouse Exon Array 1.0 are listed. Mean log<sub>2</sub> signal intensity levels are shown for triplicate replicate experiments, with *P*-values shown for differential gene expression between the two samples (calculated by one-way ANOVA). Known cone photoreceptor, horizontal and bipolar cell-specific transcripts are displayed.

#### Additional references.

Akimoto, M., Cheng, H., Zhu, D., Brzezinski, J. A., Khanna, R., Filippova, E., Oh, E. C., Jing, Y., Linares, J. L., Brooks, M. et al. (2006). Targeting of GFP to newborn rods by Nr1 promoter and temporal expression profiling of flow-sorted photoreceptors. *Proc. Natl. Acad. Sci. USA* **103**, 3890-3895.

Pochet, R., Pasteels, B., Seto-Oshima, A., Bastianelli, E., Kitajima, S. and Van Eldik, L. J. (1991). Calmodulin and calbindin localization in retina from six vertebrate species. *J. Comp. Neurol.* **314**, 750-762.
